# Supplementary material for: Tunable Wavelength generation from PM Yb-doped fiber laser modelocked by NAbLM
Source: Research Square preprint supplement (doi:10.21203/rs.3.rs-8480699/v1), 2026-01-20
Supplement: Supplementary file 1 [file 2dc16d4d93ccfadd3fa7372f.pdf]

## Supplementary Figures

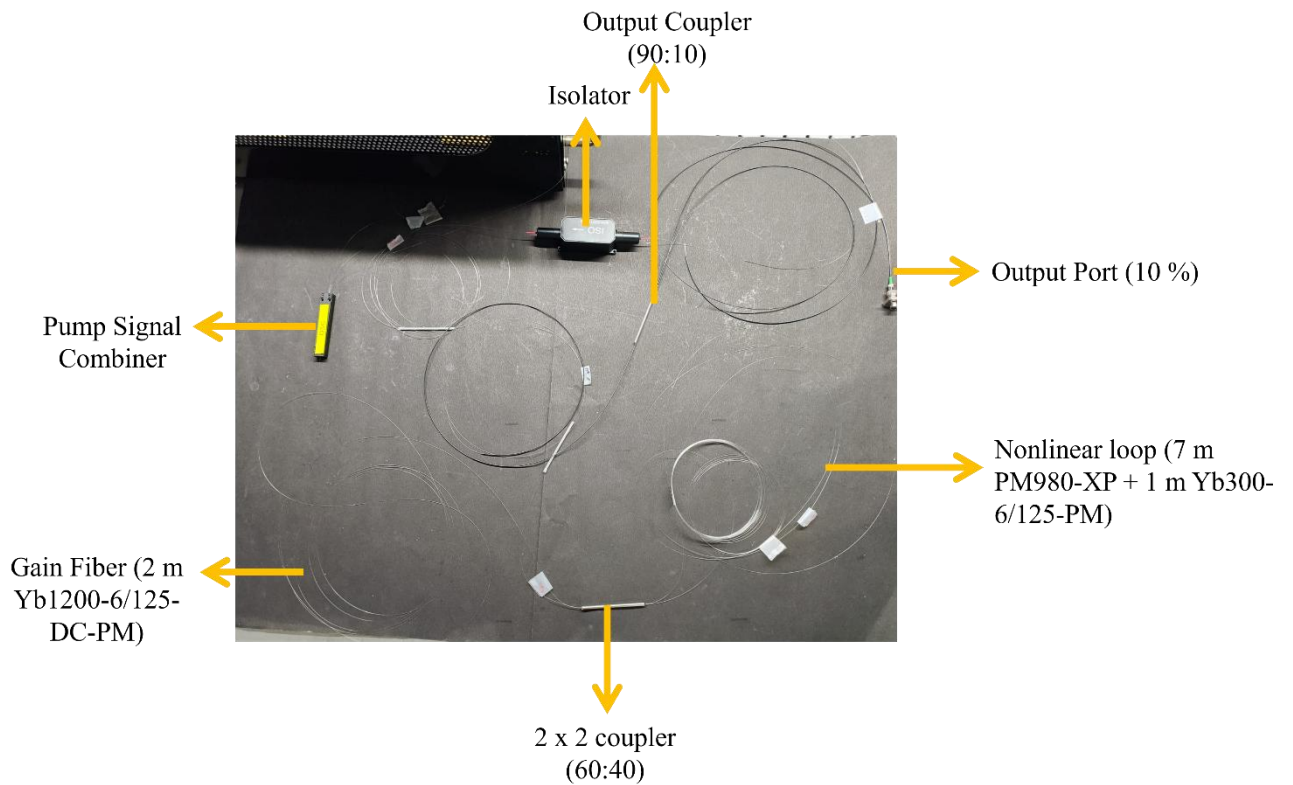

**Figure 1:** Setup of NAbLM based Figure of 8 Laser Oscillator (when pump is OFF)

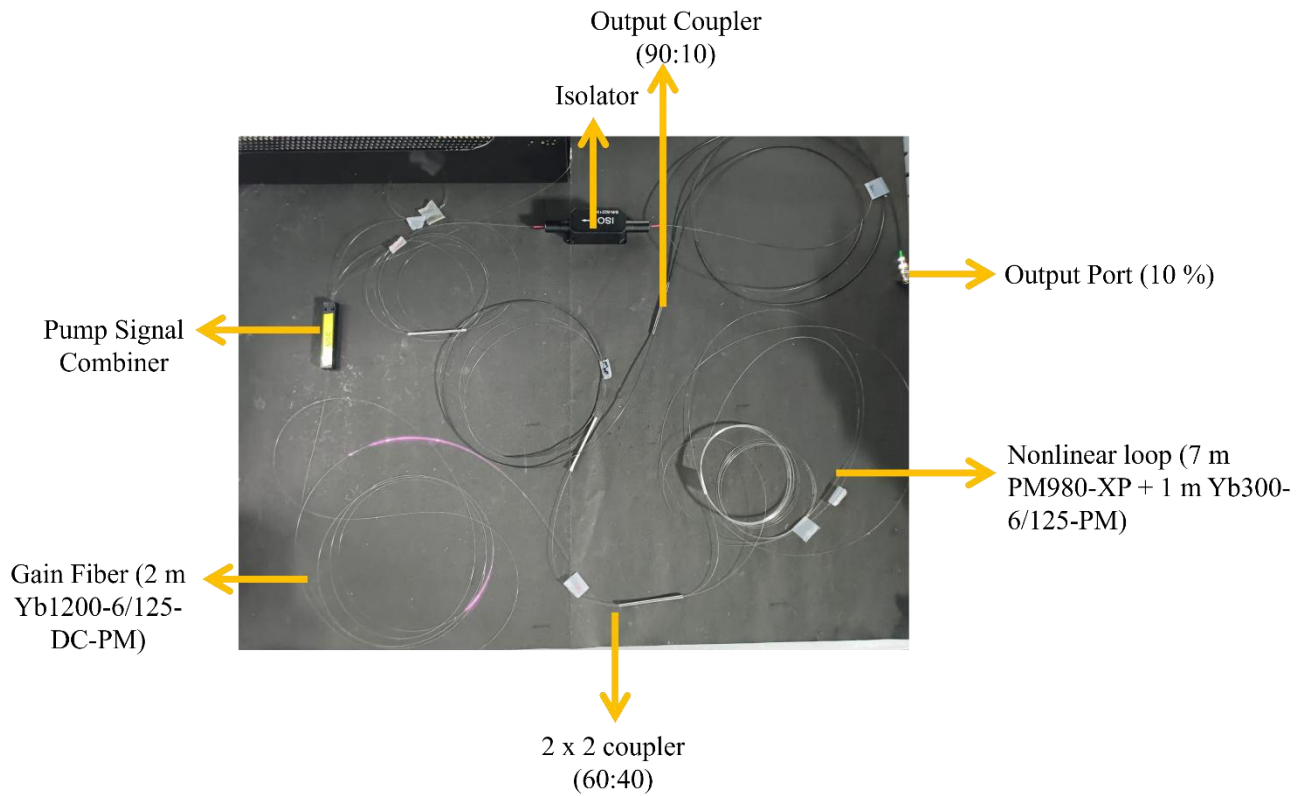

**Figure 2:** Setup of NAbLM based Figure of 8 Laser Oscillator (when pump is ON)

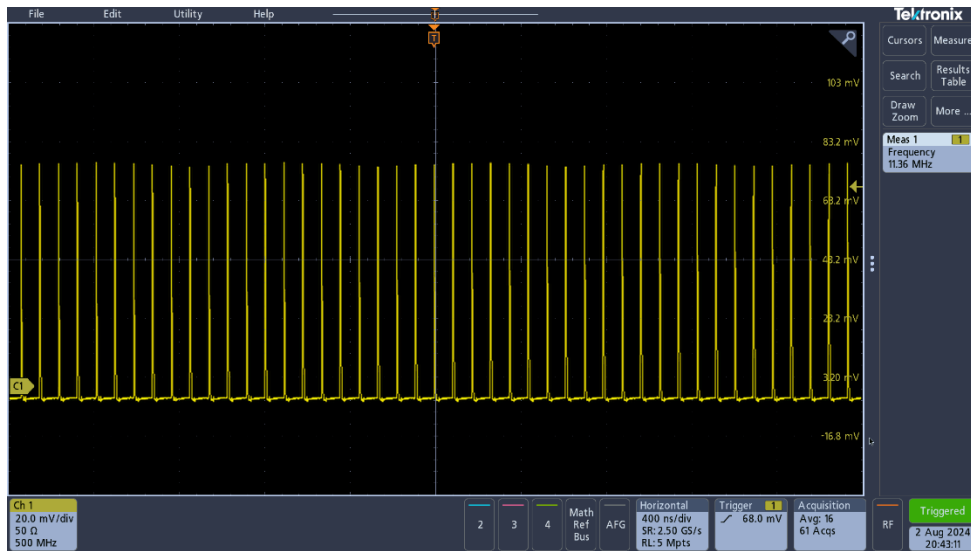

Figure 3: Oscilloscope trace of the output

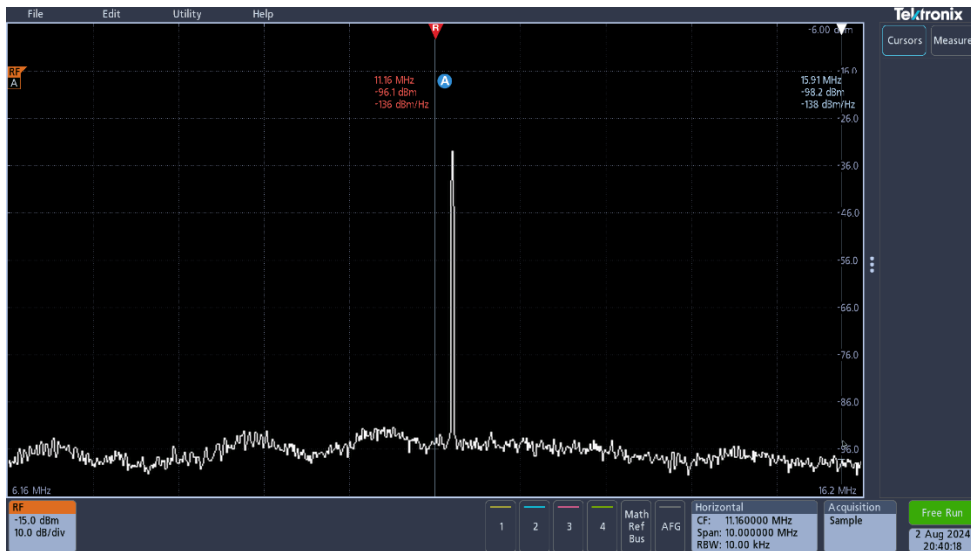

Figure 4: RF Spectrum of the output

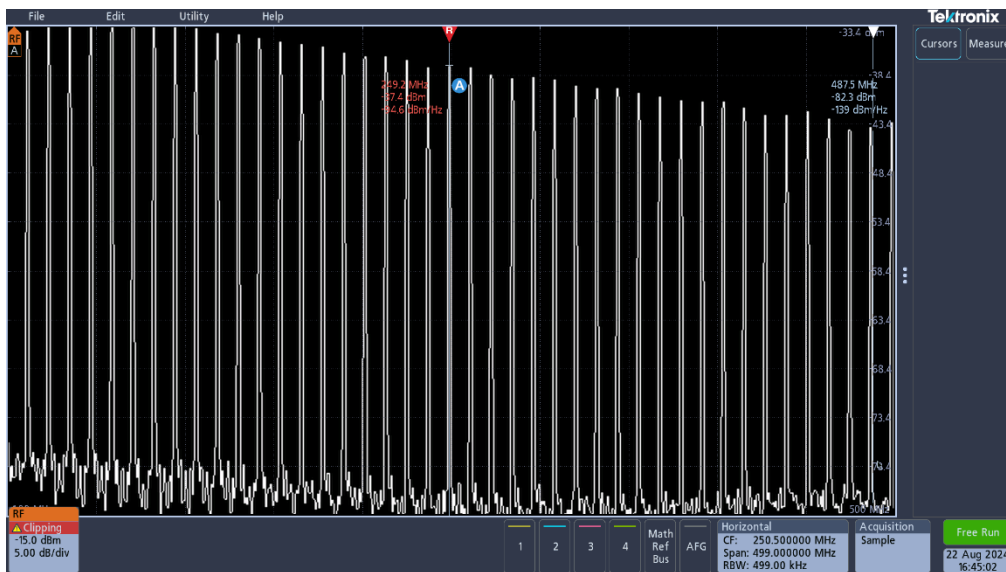

Figure 5: RF Spectrum of the output for 500 MHz span
